# Supplementary material for: The Highly Conserved Bacterial RNase YbeY Is Essential in Vibrio cholerae, Playing a Critical Role in Virulence, Stress Regulation, and RNA Processing
Source: PubMed Central journal article supplement (PMC4047096; doi:10.1371/journal.ppat.1004175), 2014-06-05
Supplement: ppat.1004175.s006.pdf [file ppat.1004175.s006.pdf]

### Supplemental Table S1.

rRNA: mapping and hybridization

| name:                                                  | sequence:                                          | used for:                                                         |
|--------------------------------------------------------|----------------------------------------------------|-------------------------------------------------------------------|
| Vc/Ec_16S_5PE                                          | 5'-GCCTGCCGCCAGCGTTCAAT-3'                         | 5' mapping of <i>V. cholerae</i> and <i>E. coli</i> 16S rRNA      |
| Vc/Ec_23S_5PE                                          | 5'-GTCCTTCATCGCCTCTGACTGCC-3'                      | 5' mapping of <i>V. cholerae</i> and <i>E. coli</i> 23S rRNA      |
| Vc_5S_5PE                                              | 5'-TGGAATCAGGTGGGTCCAAAACGCT-3'                    | 5' mapping of <i>V. cholerae</i> 5S rRNA                          |
| Ec_5S_5PE                                              | 5'-TGGGGTCAGGTGGGACCACCGCGCT-3'                    | 5' mapping of <i>E. coli</i> 5S rRNA                              |
| Vc_16S_3'CHIM                                          | 5'-mCmCCGAAmGmGmUmUmAmAmAmCmUmAmCmCmU-3'           | RNA/DNA chimera for 3' mapping of <i>V. cholerae</i> 16S rRNA     |
| Ec_16S_3'CHIM                                          | 5'-mCmCCGAAmGmGmUmUmAmAmGmCmUmAmCmCmU-3'           | RNA/DNA chimera for 3' mapping of <i>E. coli</i> 16S rRNA         |
| Vc_23S_3'CHIM                                          | 5'-mAmACGCTmUmAmCmAmCmAmCmCmUmGmCmC-3'             | RNA/DNA chimera for 3' mapping of <i>V. cholerae</i> 23S rRNA     |
| Vc_5S_3'CHIM                                           | 5'-mAmCGCTGmUmUmUmCmGmUmUmUmCmAmCmUmUmCmUmGmAmG-3' | RNA/DNA chimera for 3' mapping of <i>V. cholerae</i> 5S rRNA      |
| Vc_16S_3'                                              | 5'-AAGGAGGTGATCCAGCGCCA-3'                         | hybridization probe for 3' mapping of <i>V. cholerae</i> 16S rRNA |
| Ec_16S_3'                                              | 5'-TAAGGAGGTGATCCAACCGCA-3'                        | hybridization probe for 3' mapping of <i>E. coli</i> 16S rRNA     |
| Vc_23S_3'                                              | 5'-GGTTAAGCCTCACGGGCAATTAGTA-3'                    | hybridization probe for 3' mapping of <i>V. cholerae</i> 23S rRNA |
| Vc_5S_3'                                               | 5'-GCCTGGCGATGTTCTACTCTCACAT-3'                    | hybridization probe for 3' mapping of <i>V. cholerae</i> 5S rRNA  |
| mN ... 2'-O-methyl RNA bases; N ... standard DNA bases |                                                    |                                                                   |

sRNA: mapping and hybridization

| name:     | sequence:                                   | used for detection of:       |
|-----------|---------------------------------------------|------------------------------|
| Vc_micX   | 5'-AAAACTGTTAGTCGTGAACTAGTAAGGA-3'          | <i>V. cholerae</i> micX sRNA |
| Vc_vrrA   | 5'-ACACAAGTATAGGAGTTAATAAAAAGGAAAAAGCAGC-3' | <i>V. cholerae</i> vrrA sRNA |
| Vc_tarB_1 | 5'-ACAATACATGAGGTAACCGCTCAT-3'              | <i>V. cholerae</i> tarB sRNA |
| Vc_tarB_2 | 5'-GCCAAAAGTGCTTAATCGTCAGCTTGTA-3'          | <i>V. cholerae</i> tarB sRNA |
| Vc_6S_1   | 5'-CGCTGACGAACACCCAGGGTAAAT-3'              | <i>V. cholerae</i> 6S        |

|           |                                 |                                 |
|-----------|---------------------------------|---------------------------------|
|           |                                 | sRNA                            |
| Vc_6S_2   | 5'-CCCTGTTATGTTGCTTATCGGCTCA-3' | <i>V. cholerae</i> 6S sRNA      |
| Vc_qrr1-4 | 5'-ACAACGTCAGTTGGCTAGGTGACCC-3' | <i>V. cholerae</i> qrr1-4 sRNAs |

#### RT-qPCR

| name:       | sequence:                  | used for quantification of <i>V. cholerae</i> genes: |
|-------------|----------------------------|------------------------------------------------------|
| YbeYqPCRFw  | 5'-TGCTTTGTGGCTCACTCGAA-3' | <i>ybeY</i> (forward)                                |
| YbeYqPCRRv  | 5'-GTTCAAATTCAGCGCATGGC-3' | <i>ybeY</i> (reverse)                                |
| 5SqPCRFw    | 5'-TAGCGTTTTGGACCCACCTG-3' | 5S rRNA (forward)                                    |
| 5SqPCRRv    | 5'-GACCCACACTACCATCGAC-3'  | 5S rRNA (reverse)                                    |
| RneNTqPCRFw | 5'-TGCGTGAAGGTCAGGAAGTC-3' | <i>rne</i> N-terminal domain (forward)               |
| RneNTqPCRRv | 5'-AGATAGCTACCCGCCAGACT-3' | <i>rne</i> N-terminal domain (reverse)               |
| RneCTqPCRFw | 5'-CTTCTTCGGCGCACTGAAAG-3' | <i>rne</i> C-terminal domain (forward)               |
| RneCTqPCRRv | 5'-CTGTTGACGTTCCGGTTTCG-3' | <i>rne</i> C-terminal domain (reverse)               |
| RnrVcqPCRFw | 5'-AACCCACAAGTCGATCGCTT-3' | <i>rnr</i> (forward)                                 |
| RnrVcqPCRRv | 5'-GCGAGTTCATTACCGCTTCG-3' | <i>rnr</i> (reverse)                                 |
